# Supplementary material
Source: MDPI journal article supplement (https://www.mdpi.com/2071-1050/15/6/4740)
Supplement: s1 [file s1]

Archive with 2 entries (2 files):
- Supplementary material I Inventory data.pdf
- Supplementary material II Interview guide and survey.pdf
