# Supplementary material
Source: MDPI journal article supplement (https://www.mdpi.com/2071-1050/15/6/4740)
Supplement: s1 [file s1 › Supplementary material I Inventory data.pdf]

# **Supplementary material Section I: Inventory data**

## **Table of content**

|    |                                                               |   |
|----|---------------------------------------------------------------|---|
| 1. | List of local food activities and processes considered.....   | 2 |
| 2. | List of descriptors of activities, data sources and LCIs..... | 3 |
| 3. | Mouans-Sartoux case study data .....                          | 4 |
| 4. | Limits and uncertainty related to the data used .....         | 5 |
| 5. | Supplemental references.....                                  | 6 |

# 1. List of local food activities and processes considered

**Table S1.** Local agri-food activities considered in the scope.

| <b>Activity type</b>                    | <b>Activities considered</b>                        | <b>Allocation rules/<br/>Processes considered</b>     | <b>Not included in the scope</b>                                                                                                                                                                                                                                                               |
|-----------------------------------------|-----------------------------------------------------|-------------------------------------------------------|------------------------------------------------------------------------------------------------------------------------------------------------------------------------------------------------------------------------------------------------------------------------------------------------|
| <b>Production</b>                       | Agricultural production                             | Farm gate                                             | <ul style="list-style-type: none"> <li>– Floriculture is not considered</li> <li>– Only major cultures are considered due to the high diversity in some horticultural farms producing more than thirty different varieties</li> </ul>                                                          |
| <b>Processing &amp; retail industry</b> | Supermarkets, bakeries, and food-specialized stores | Energy consumption                                    | <ul style="list-style-type: none"> <li>– Water and gaz consumption are not considered significant in the territory</li> <li>– Building constructions are not included as they would significantly increase the impact</li> <li>– No processing industries exist in the municipality</li> </ul> |
| <b>Transportation</b>                   | Farmers transport, Consumer trips to shopping       | Vehicle, maintenance, infrastructure, fuel            | <ul style="list-style-type: none"> <li>– Transport of imported food is considered in the consumption activity type</li> </ul>                                                                                                                                                                  |
| <b>Consumption</b>                      | Imported food                                       | Production, transport, processing, packaging, cooking | <ul style="list-style-type: none"> <li>– Locally produced and consumed food is deduced from the global consumption</li> </ul>                                                                                                                                                                  |
| <b>Food waste</b>                       | Food waste treatment                                | Treatment facility, transport, biowaste incineration  | <ul style="list-style-type: none"> <li>– The impact of domestic composting is considered negligible due to its minor impact as well as the avoided emissions it</li> </ul>                                                                                                                     |

generates that compensate its  
impat (APESA, 2015)

## 2. List of activity descriptors, data sources and LCIs

**Table S2.** Data sources and background LCI databases used for each activity descriptor.

| Activity type                           | Activity descriptors                        | Units | Data sources                                                                                                                                                                | LCI                                                |
|-----------------------------------------|---------------------------------------------|-------|-----------------------------------------------------------------------------------------------------------------------------------------------------------------------------|----------------------------------------------------|
| <b>Production</b>                       | Annual production                           | t     | Agricultural surfaces identification: RPG (2019)<br>Farmers contact: Municipal agricultural board<br>Volume produced: Farmers' interview                                    | Agribalyse V3.0 (Colomb et al., 2015)              |
| <b>Processing &amp; retail industry</b> | Annual electricity consumption              | MWh   | Industry identification: SIRENE database: INSEE (2021)<br>Annual consumption: Enedis<br>Open data (Enedis, 2021)<br>Energy sources and reduction: Retail managers interview | Ecoinvent 3 (Wernet et al., 2016)<br>French market |
| <b>Transportation</b>                   | Annual farmers transport                    | Kgkm  | Volume, distance, vehicle type: Farmers' interview                                                                                                                          | Ecoinvent 3 European freight                       |
|                                         | Consumer trips to shopping                  | km    | Distance, frequency: population survey                                                                                                                                      | Ecoinvent 3 French car market                      |
| <b>Consumption</b>                      | Annual food consumption by local population | kg    | Local food diets: INCA3 database (Anses, 2017)                                                                                                                              | Agribalyse V3.0                                    |
| <b>Food waste</b>                       | Annual biowaste treatment                   | t     | Local waste treatment facility                                                                                                                                              | Ecoinvent 3 Specific treatment facilities          |

### 3. Mouans-Sartoux case study data

**Table S3.** Foreground data for Mouans-Sartoux case study including years 2017 and 2022.

| Activity type                           | Activity descriptors                                                                                                        | 2017 value                          | 2022 value                          | Extrapolation, and justification                                                                                               |
|-----------------------------------------|-----------------------------------------------------------------------------------------------------------------------------|-------------------------------------|-------------------------------------|--------------------------------------------------------------------------------------------------------------------------------|
| <b>Production</b>                       | Annual production of vegetables: zucchini, tomato, leek, salad, melon, olives, onion, potatoes, squash, cauliflower, carrot | 65 t (35 organic + 30 conventional) | 65 t (55 organic + 10 conventional) | Quantities are adjusted to be equal to not consider annual climate differences. Only major cultures are considered.            |
|                                         | Annual production of goat cheese                                                                                            | 0.6 t                               | 0.6 t                               |                                                                                                                                |
| <b>Processing &amp; retail industry</b> | Annual electricity consumption                                                                                              | 1436 MWh                            | 1330 MWh                            | In 2022, 120 MWh is obtained from photovoltaic production                                                                      |
| <b>Transportation</b>                   | Annual farmers transport                                                                                                    | 2,988 kgkm                          | 2,988 kgkm                          | No significant change took place in the 5-year period                                                                          |
|                                         | Consumer car trips to the shopping                                                                                          | 2,204,480 km                        | 1,755,360 km                        | Extrapolation of the survey data                                                                                               |
| <b>Consumption</b>                      | Annual fruits & vegetable consumption                                                                                       | 1,500 t                             | 1,680 t                             | The INCA (Anses, 2017) data for the southern French region are extrapolated to the municipality population of 9500 inhabitants |
|                                         | Annual dairy & eggs consumption                                                                                             | 950 t                               | 936 t                               |                                                                                                                                |
|                                         | Annual meat & fish consumption                                                                                              | 542 t                               | 434 t                               |                                                                                                                                |
|                                         | Other consumption (ultra-processed food, beverages, ready-to-eat meals...)                                                  | 10,300 t                            | 7,210 t                             |                                                                                                                                |
| <b>Food waste</b>                       | Annual biowaste treatment                                                                                                   | 1410 t                              | 1171 t                              |                                                                                                                                |

## 4. Limits and uncertainty related to the data used

Territorial LCA requires important data collection. Publicly available data are available for most cases but their confrontation with the local observation proved to be imprecise. For instance, concerning agricultural land, some declared grazing surfaces were unoccupied and several small-scale farmers were not included in the database. Similarly, despite the SIRENE database being the most precise industry identification dataset, when the data were confronted with the actual local situation, 39 % of the stores and industries identified were either closed, non-existing or moved elsewhere. At the territorial scale used in this study, collecting more precise local data seemed thereby fundamental.

Related to the consumption / imported food production data, the INCA3 database is considered to be the most detailed food database in France. Yet the data used are related to the consumption of inhabitants of the entire Southern French region which might slightly differ from the local consumption. Yet for the purposes of this study, the extrapolation technique seemed to be sufficient.

Finally, the available LCI databases corresponded to processes detected in the territory (French market processes, French food products...). Yet there are several major limits related to the organic products Agribalyse dataset (Institut technique de l'agriculture biologique (ITAB), 2020; Nitschelm et al., 2020). Firstly, not all conventional products have their organic equivalent. Secondly, the samples used for database construction are not considered representative of the French market. Nevertheless, we decided to use the database for three reasons. First, it models the selected fruits and vegetable production in Southern France whose pedoclimatic context might be considered similar to the studied territory. Second, no other similar database is available for the chosen products. Finally, the database is used only for measuring the potential contribution of each action and not to conduct any specific conventional and organic farming comparison.

## 5. Supplemental references

- Anses. (2017). *Étude individuelle nationale des consommations alimentaires 3 (INCA 3)*.
- APESA, O. B. I. S. (2015). *Impact sanitaire et environnementaux du compostage domestique – Rapport. Partie B - 109 pages*. [https://bilans-ges.ademe.fr/documentation/UPLOAD\\_DOC\\_FR/APESA,%20OLENTICA,%20BIO%20Intelligence%20Service.%202015.%20Impact%20sanitaire%20et%20environnementaux%20du%20compostage%20domestique%2096%20Rapport.%20Partie%20B%20-%20109%20pages](https://bilans-ges.ademe.fr/documentation/UPLOAD_DOC_FR/APESA,%20OLENTICA,%20BIO%20Intelligence%20Service.%202015.%20Impact%20sanitaire%20et%20environnementaux%20du%20compostage%20domestique%2096%20Rapport.%20Partie%20B%20-%20109%20pages)
- Colomb, V., Ait-Amar, S., Basset-Mens C., Gac, A., Gaillard, G., Koch, P. , Mousset, J. , Salou, T. , Tailleur, A., & and Van Der Werf, H. M. (2015). *AGRIBALYSE®, the French LCI Database for agricultural products: high-quality data for producers and environmental labelling*.
- Enedis. (2021). Enedis Open Data. In *Consommation et thermosensibilité électriques annuelles à la maille commune*. <https://data.enedis.fr/explore/dataset/consommation-electrique-par-secteur-dactivite-commune/information/>
- INSEE. (2021). Database SIRENE. <https://www.sirene.fr/Sirene/Public/Creation-Fichier>.
- Institut technique de l'agriculture biologique (ITAB). (2020). *Questions sur la pertinence des données Agribalyse 3.0 pour l'évaluation environnementale des produits agricoles et l'affichage environnemental des produits alimentaires*.
- Nitschelm, L., Flipo, B., Auberger, J., Chambaut, H., Colomb, V., Gac, A., Dauguet, S., Espagnol, S., le Gall, C., Malnoe, C., Perrin, A., Ponchant, P., Renaud-Gentié, C., Roinsard, A., Sautereau, N., Tailleur, A., & van der Werf, H. (2020). *Transition towards organic and sustainable food systems USING LIFE CYCLE ASSESSMENT TO ASSESS AND IMPROVE THE ENVIRONMENTAL PERFORMANCE OF ORGANIC PRODUCTION SYSTEMS*.
- RPG. (2019). Registre parcellaire graphique (RPG) : contours des parcelles et îlots culturaux et leur groupe de cultures majoritaire. In <https://www.data.gouv.fr/en/datasets/registre-parcellaire-graphique-rpg-contours-des-parcelles-et-ilots-culturaux-et-leur-groupe-de-cultures-majoritaire/>.
- Wernet, G., Bauer, C., Steubing, B., Reinhard, J., Moreno-Ruiz, E., & Weidema, B. (2016). The ecoinvent database version 3 (part I): overview and methodology. *International Journal of Life Cycle Assessment*, 21(9), 1218–1230. <https://doi.org/10.1007/s11367-016-1087-8>
