# Supplementary material
Source: MDPI journal article supplement (https://www.mdpi.com/2071-1050/15/6/4740)
Supplement: s1 [file s1 › Supplementary material II Interview guide and survey.pdf]

## Supplementary material Section II: Interview guides & questionnaires

Three types of surveys and interviews were conducted: farmers, food retail managers and the local population. The interviews and survey took place in the period of February-May 2022. The semi-directed interview with professionals took place at farms and supermarkets. Related to the population survey, part of it was distributed through the internet by the municipality representatives and the municipal website. To obtain a representative sample, direct surveys were conducted in various places in the municipality to complete the internet survey. The section below presents the original and the translated version of the interview guides and population survey concerning questions used in the assessment. The order is the following:

1. English version
  - a. Farmers' interview guide
  - b. Food retail managers interview guide
  - c. Population survey
2. French version
  - a. Farmers' interview guide
  - b. Food retail managers interview guide
  - c. Population survey

# Impact of the Mouans-Sartoux food policy on local farmers

Your link with the actions of the municipality of Mouans-Sartoux

1. Did you participate in some of the actions carried out by the municipality?

*Plusieurs réponses possibles.*

- ☐ The city helped me to find or develop agricultural land
- ☐ I work for the farm delivering food to school canteens
- ☐ I participate in the city's farmers' market
- ☐ The city helped me to find food outlets (AMAP, Boomerang grocery store...)
- ☐ The city communicates about my business and my products
- ☐ The city sought my expertise/knowledge or experience
- ☐ None of these actions

2. More specifically, can you quickly present the activities related to the project(s) with the MEAD/ municipality of Mouans-Sartoux?

---

Your farm

3. Can you quickly present your farm?

surface per crop, type and number of main crops, livestock, date of installation...

---

4. Can you estimate the average volume produced annually (by crop if possible)

---

5. Are any of your products certified?

*Plusieurs réponses possibles.*

- ☐ Yes, by a geographical indication (PDO, AOC, PGI)
- ☐ Yes, by a quality label (Label Rouge, etc.)
- ☐ Yes, in organic agriculture or equivalent (AB, Nature & Progrès, etc.)
- ☐ Yes, in biodynamics (Demeter, etc)
- ☐ Yes, High Environmental Value, level I or II
- ☐ Yes, High Environmental Value, level III option A
- ☐ Yes, High Environmental Value, level III option B

6. If so, how long have you been involved in these certifications?

---

7. Have your field or post-harvest practices changed in the last 5 years? In what way?

Practices that may be concerned: fertilization, phytosanitary treatments, water management, length of rotations, tillage, species/varieties sown, animal health, animal feed, hedge planting, etc.

---

8. Were these changes influenced by city-related projects or by municipality policy in general?

If not, what influenced your change?

---

### Impact of the Mouans-Sartoux food policy

9. As a result of the local food strategy, do you feel more concerned/involved in :

*Plusieurs réponses possibles.*

- ☐ Climate change
- ☐ Animal welfare
- ☐ Environmental impact
- ☐ Living conditions of your family or employees
- ☐ Health
- ☐ Water protection
- ☐ Impacts of chemical pollution
- ☐ Diffuse pollution
- ☐ I don't feel more concerned than before

10. In conclusion, do you think that the city's food policy has had an influence on the evolution of your practices?

*Plusieurs réponses possibles.*

- ☐ Yes, on the development of more environmentally friendly practices
- ☐ Yes, on how my products are sold
- ☐ Yes, on climate change adaptation practices
- ☐ Yes, on my resilience to climatic or economic threats
- ☐ Yes, on my production capacity
- ☐ Yes, on my autonomy (towards services, inputs, labor)
- ☐ Yes, on the awareness of global social and environmental issues
- ☐ Yes, on my involvement in the local social and economic tissue
- ☐ No, I don't think so

---

Ce contenu n'est ni rédigé, ni cautionné par Google.

Google Forms

# Impact of the Mouans-Sartoux food policy on the local economic actors

To start with..

1. Specify your company and your position/job:

---

2. In particular, have you participated in/benefited from the following projects in connection with the municipality of Mouans-Sartoux:

*Plusieurs réponses possibles.*

- ☐ I have a partnership with the city/ MEAD/ CCAS (social centre).
- ☐ I deliver to the collective catering (canteen of the elementary school or the nursery...)
- ☐ I participate in the project "Sustainable food in the company" led by the club of entrepreneurs of the Pays de Grasse
- ☐ The city communicates about my business and my products
- ☐ The city helped me to find outlets/suppliers (contact with farmers...)
- ☐ I did not participate in any of these actions

3. Has the participation in this action had an influence on your professional activity?

---

### Environmental management

4. Does your company have a label of commitment to the environment, climate or biodiversity?

*Une seule réponse possible.*

- ☐ Yes, through participation in one of the projects with the city
- ☐ Yes, but not linked to the city
- ☐ No

5. If so, please specify the certification(s) in question:

---

6. Do you have a program in place dedicated to energy optimization or greenhouse gas emissions reduction?

*Une seule réponse possible.*

- ☐ Yes
- ☐ No

7. Have you managed to reduce your energy consumption in recent years?

*Une seule réponse possible.*

☐ Yes

☐ No

8. Can you indicate your annual energy consumption (or estimate) in MWh/year or in euros for electricity and heating and the associated supplier or energy source?

---

9. Can you specify if there are other actions in favor of the environment carried out by your establishment

---

10. Do you supply with organic and local products? If yes, can you elaborate (suppliers, distances...)

---

Influence of the city

11. Would you say that the local food policy has had an influence on any of these components:

*Plusieurs réponses possibles.*

- ☐ Yes, on my installation in the territory
- ☐ Yes, on the change towards sustainability (energy consumption, labels...)
- ☐ Yes, on the choice of products (organic or local products)
- ☐ Yes, on my resilience to different shocks and threats
- ☐ Maybe
- ☐ Not at all

---

Ce contenu n'est ni rédigé, ni cautionné par Google.

Google Forms

# Eating in Mouans-Sartoux

## 1. Age

*Une seule réponse possible.*

- ☐ Under 15 years old
- ☐ Between 15 and 24 years old
- ☐ Between 25 and 34 years old
- ☐ Between 35 and 49 years old
- ☐ Between 50 and 64 years old
- ☐ Over 65 years old

## 2. Gender :

*Une seule réponse possible.*

- ☐ male
- ☐ female

3. Profession :

*Une seule réponse possible.*

- ☐ Farmer
- ☐ Craftsman, merchant, company manager
- ☐ Executive or higher intellectual profession
- ☐ Intermediate profession
- ☐ Employee
- ☐ Worker
- ☐ Retiree
- ☐ Student
- ☐ No professional activity

Food shopping trips

4. Where do you usually do your food shopping?

*Plusieurs réponses possibles.*

|                     | Supermarker or<br>hypermarket | Grocery store, general food store,<br>specialty store (fishmonger, butcher, etc.) | Organic<br>shop          | AMAP and other<br>basket systems | Market                   | Farm                     |
|---------------------|-------------------------------|-----------------------------------------------------------------------------------|--------------------------|----------------------------------|--------------------------|--------------------------|
| <b>Mainly</b>       | <input type="checkbox"/>      | <input type="checkbox"/>                                                          | <input type="checkbox"/> | <input type="checkbox"/>         | <input type="checkbox"/> | <input type="checkbox"/> |
| <b>Regularly</b>    | <input type="checkbox"/>      | <input type="checkbox"/>                                                          | <input type="checkbox"/> | <input type="checkbox"/>         | <input type="checkbox"/> | <input type="checkbox"/> |
| <b>Occasionally</b> | <input type="checkbox"/>      | <input type="checkbox"/>                                                          | <input type="checkbox"/> | <input type="checkbox"/>         | <input type="checkbox"/> | <input type="checkbox"/> |

5. What mode of transport do you primarily use for your food shopping ?

*Une seule réponse possible par ligne.*

|                    | By car/ motorcycle    | By public transport   | By bike / on foot     |
|--------------------|-----------------------|-----------------------|-----------------------|
| <b>5 years ago</b> | <input type="radio"/> | <input type="radio"/> | <input type="radio"/> |
| <b>Nowadays</b>    | <input type="radio"/> | <input type="radio"/> | <input type="radio"/> |

6. How often do you use this mode of transportation to go food shopping?

*Une seule réponse possible par ligne.*

|                    | Less than once every 2 weeks | Once every 2 weeks    | Once a week           | Twice a week          | More than twice a week |
|--------------------|------------------------------|-----------------------|-----------------------|-----------------------|------------------------|
| <b>5 years ago</b> | <input type="radio"/>        | <input type="radio"/> | <input type="radio"/> | <input type="radio"/> | <input type="radio"/>  |
| <b>Nowadays</b>    | <input type="radio"/>        | <input type="radio"/> | <input type="radio"/> | <input type="radio"/> | <input type="radio"/>  |

7. How far (approximately)\* do you travel to do your food shopping (round trip)?

\*if you do your food shopping on your way to work/school etc. please indicate the ADDITIONAL distance you travel to the store

*Une seule réponse possible par ligne.*

|                    | < 3 km                | 3-6 km                | 6-10 km               | 10-15 km              | > 15 km               |
|--------------------|-----------------------|-----------------------|-----------------------|-----------------------|-----------------------|
| <b>5 years ago</b> | <input type="radio"/> |
| <b>Nowadays</b>    | <input type="radio"/> |

Dietary regimes

8. How would you define the evolution of your diet over the past 5 years??

*Une seule réponse possible par ligne.*

|                                                                                                         | 5 years ago           | Nowadays              |
|---------------------------------------------------------------------------------------------------------|-----------------------|-----------------------|
| <b>Omnivore, and big consumer of meat (the equivalent of more than 1 minced steak per day)</b>          | <input type="radio"/> | <input type="radio"/> |
| <b>Omnivore and moderate consumer of meat (the equivalent of half to one hamburger steak per day)</b>   | <input type="radio"/> | <input type="radio"/> |
| <b>Omnivore, and occasional meat eater (less than half a steak a day)</b>                               | <input type="radio"/> | <input type="radio"/> |
| <b>I am a pescetarian: I do not eat meat but fish and animal products: milk, cream, butter, eggs...</b> | <input type="radio"/> | <input type="radio"/> |
| <b>I am vegetarian: I do not eat meat or fish, but animal products: milk, cream, butter, eggs...</b>    | <input type="radio"/> | <input type="radio"/> |

---

**I am vegan: I do not  
eat meat, fish or  
animal products**

---

☐☐

- NB: if you do not consume certain products (e.g. meat) when this was already the case before your change, choose the "NO CHANGE" option

[illegible]

canned,  
frozen)

**Nuts  
(walnuts,  
almonds)**

☐☐☐☐☐☐☐

**Bread, pasta,  
rice,  
semolina,  
etc.**

☐☐☐☐☐☐☐

**Alcohol**

☐☐☐☐☐☐☐

**Sugary  
drinks**

☐☐☐☐☐☐☐

**Desserts**

☐☐☐☐☐☐☐

10. Do you eat organic products? If yes, for which food category?

*Une seule réponse possible par ligne.*

|                                                   | Yes, sometimes organic but it remains a minority | Yes, mostly organic   | Very little or not at all |
|---------------------------------------------------|--------------------------------------------------|-----------------------|---------------------------|
| <b>Meat</b>                                       | <input type="radio"/>                            | <input type="radio"/> | <input type="radio"/>     |
| <b>Dairy products &amp; eggs</b>                  | <input type="radio"/>                            | <input type="radio"/> | <input type="radio"/>     |
| <b>Fruits and vegetables</b>                      | <input type="radio"/>                            | <input type="radio"/> | <input type="radio"/>     |
| <b>Cereals (pasta, rice..)<br/>&amp; potatoes</b> | <input type="radio"/>                            | <input type="radio"/> | <input type="radio"/>     |

11. Has your consumption of organic products changed over the last 5 years?

*Une seule réponse possible.*

- ☐ At least half as much
- ☐ A little less
- ☐ No it hasn't changed
- ☐ A little more than before
- ☐ At least twice as much as before

12. Are there any products that you buy in BULK (without packaging)?

*Plusieurs réponses possibles.*

- ☐ Fruits and vegetables
- ☐ Cereals (pasta, rice..)
- ☐ Cheese
- ☐ Meat
- ☐ I drink tap water instead of buying bottled water
- ☐ Other drinks/liquids (wine, oil...)
- ☐ I do not buy products in bulk

13. What is the proportion of the products purchased in bulk 5 years ago and today?

*Plusieurs réponses possibles.*

|                    | Very small               | Small (about 1/4 of the products purchased) | About HALF of the products purchased | Important (more than 3/4 of the products purchased) |
|--------------------|--------------------------|---------------------------------------------|--------------------------------------|-----------------------------------------------------|
| <b>5 years ago</b> | <input type="checkbox"/> | <input type="checkbox"/>                    | <input type="checkbox"/>             | <input type="checkbox"/>                            |
| <b>Nowadays</b>    | <input type="checkbox"/> | <input type="checkbox"/>                    | <input type="checkbox"/>             | <input type="checkbox"/>                            |

14. What is the proportion of seasonal products in your food basket 5 years ago and today?

*Plusieurs réponses possibles.*

|                    | Very small               | Small (about 1/4 of the products purchased) | About HALF of the products purchased | Important (more than 3/4 of the products purchased) |
|--------------------|--------------------------|---------------------------------------------|--------------------------------------|-----------------------------------------------------|
| <b>5 years ago</b> | <input type="checkbox"/> | <input type="checkbox"/>                    | <input type="checkbox"/>             | <input type="checkbox"/>                            |
| <b>Nowadays</b>    | <input type="checkbox"/> | <input type="checkbox"/>                    | <input type="checkbox"/>             | <input type="checkbox"/>                            |

## Food waste

15. How do you manage your food waste (leftover food, peelings, expired products, ...)?

*Une seule réponse possible.*

- ☐ Individual composting
- ☐ Collective composting
- ☐ Regular trash bin
- ☐ Municipal bio-waste collection

16. The average food waste per French person represents about 30% of the food purchased! Concerning your household, would you say that between expired products, forgotten fruits and leftovers from uneaten meals, the proportion of food thrown away in the garbage amounts to (approximately) what proportion before and after your change (during the last 5 years)?

*Une seule réponse possible par ligne.*

|                    | >10 %                 | 10 - 30%              | around 30%            | 30 - 50%              | More than half of the food purchased (or received) is thrown away |
|--------------------|-----------------------|-----------------------|-----------------------|-----------------------|-------------------------------------------------------------------|
| <b>5 years ago</b> | <input type="radio"/>                                             |
| <b>Nowadays</b>    | <input type="radio"/>                                             |

17. What products do you waste less today than you did 5 years ago?

*Plusieurs réponses possibles.*

- ☐ Fruits and vegetables
- ☐ Dairy /fish/meat
- ☐ Processed products (bread, chocolate, ready-to-eat meals...)

Influence of the municipal food policy

18. Do you think that the municipality actions and its food policy have had an influence on the evolution of your eating habits (shopping, menus, waste, etc)?

*Plusieurs réponses possibles.*

- ☐ Yes, at the place of purchase (supermarket, market...)
- ☐ Yes, on transportation (mode/distance of travel)
- ☐ Yes, on changing diets (more or less meat, vegetables..)
- ☐ Yes, on the purchase of organic products
- ☐ Yes, on bulk purchasing
- ☐ Yes, on the purchase of seasonal products
- ☐ Yes, on composting
- ☐ Yes, on food waste reduction
- ☐ Yes, on my knowledge of sustainable food systems
- ☐ No, I don't think I'm influenced by the city's actions

19. Have you participated in any of the actions listed below? (check all that apply to you in any way)

*Plusieurs réponses possibles.*

- ☐ Your child(ren) attend(s) or have attended the public school canteen
- ☐ You or a member of your family attends the social grocery store
- ☐ You or a member of your family participated in the "Challenge Families with Positive Diet"
- ☐ You go to the city's Wednesday evening farmers' market
- ☐ You are participating in the urban agriculture project "The citizen feeds the city".
- ☐ You have participated in an event of the "Sustainable food in companies" project
- ☐ You have participated in an event organized by the Maison de l'Education à l'Alimentation Durable (MEAD): Printemps des possibles, Festival Alimenterre...

---

Ce contenu n'est ni rédigé, ni cautionné par Google.

**Google Forms**

# Impact de la politique alimentaire de la ville sur les agriculteurs du territoire

Votre lien avec les actions de la ville de Mouans-Sartoux

1. Avez-vous participé à certaines actions portées par la Ville de Mouans-Sartoux ?

*Plusieurs réponses possibles.*

- ☐ La ville m'a aidé à trouver ou à aménager le foncier agricole
- ☐ Je travaille pour la régie agricole
- ☐ Je participe au marché de producteurs de la ville
- ☐ La ville m'a aidé à trouver des débouchés (AMAP, l'épicerie Boomerang...)
- ☐ La ville communique sur mon activité et mes produits
- ☐ La ville a sollicité mon expertise/ mes connaissances ou mon expérience
- ☐ Aucune de ces actions

2. Plus spécifiquement, pouvez vous nous présenter rapidement les activités liées au(x) projet(s) avec la MEAD/ ville de Mouans-Sartoux?

---

Votre exploitation

3. Pouvez-vous présenter rapidement votre exploitation, vos ateliers ?

SAU par atelier, type et nb de cultures majoritaires, d'élevage, date d'installation, surface...

---

4. Pouvez-vous estimer le volume moyen produit annuellement (par culture si possible)

---

5. Certains de vos produits sont-ils certifiés ?

*Plusieurs réponses possibles.*

- ☐ Oui, par une indication géographique (AOP, AOC, IGP)
- ☐ Oui, par un label de qualité (Label Rouge, etc.)
- ☐ Oui, en agriculture biologique ou équivalent (AB, Nature & Progrès, etc.)
- ☐ Oui, en biodynamie (Déméter, etc)
- ☐ Oui, Haute Valeur Environnementale, niveau I ou II
- ☐ Oui, Haute Valeur Environnementale, niveau III option A
- ☐ Oui, Haute Valeur Environnementale, niveau III option B
- ☐ Autre : 

---

6. Si oui, depuis quand êtes-vous engagé(e) dans ces certifications ?

---

## Pratiques au champs

7. Vos pratiques au champ ou post-récolte ont-elles évolué ces 5 dernières années ? De quelle manière ?

Pratiques pouvant être concernées : fertilisation, traitements phytos, gestion de l'eau, longueur des rotations, travail du sol, espèces/varieties semées, santé animale, alimentation des animaux, plantation de haies, etc.

---

8. Ces changements ont-ils été influencé par les projets en lien avec la ville ou par sa politique en général?

Sinon, qu'est-ce qui a influencé votre changement?

---

## Impact de la politique alimentaire de Mouans-Sartoux

9. Grâce au(x) projet(s) avec la ville, vous sentez-vous plus concerné(e)/investi(e) par :

*Plusieurs réponses possibles.*

- ☐ Le changement climatique
- ☐ Le bien-être animal
- ☐ Les impacts sur l'environnement
- ☐ Les conditions de vie de votre famille ou de vos employés
- ☐ La santé
- ☐ Protection de l'eau
- ☐ Les impacts de la pollution chimique
- ☐ Pollution diffuse
- ☐ Je ne me sens pas plus concerné qu'avant

10. En bilan, pensez-vous que la politique alimentaire de la ville ont eu une influence sur l'évolution de vos pratiques?

*Plusieurs réponses possibles.*

- ☐ Oui, sur le développement des pratiques plus respectueuses de l'environnement
- ☐ Oui, sur le mode de valorisation de mes produits
- ☐ Oui, sur les pratiques d'adaptation au changement climatique
- ☐ Oui, sur ma résilience vis-à-vis des aléas climatiques ou économiques
- ☐ Oui, sur ma capacité à produire
- ☐ Oui, sur mon autonomie (vis-à-vis des services, intrants, main d'oeuvre)
- ☐ Oui, sur la prise de conscience des enjeux sociaux et environnementaux mondiaux
- ☐ Oui, sur mon implication dans le tissu social et économique local
- ☐ Non, je ne le pense pas

---

Ce contenu n'est ni rédigé, ni cautionné par Google.

**Google Forms**

# Impact de la politique alimentaire de la ville sur les acteurs économiques du territoire

Pour commencer...

1. Précisez votre entreprise et votre poste/métier :

---

2. En particulier, avez-vous participé à/bénéficié des projets suivant en lien avec la ville de Mouans-Sartoux:

*Plusieurs réponses possibles.*

- ☐ J'ai un partenariat avec la ville/ la MEAD/ CCAS..
- ☐ Je livre à la restauration collective (cantine des écoles primaires ou des creches...)
- ☐ Je participe au projet "Alimentation durable dans l'entreprise" mené par le club d'entrepreneurs du Pays de Grasse
- ☐ La ville communique sur mon activité et mes produits
- ☐ La ville m'a aidé à trouver des débouchés/ des fournisseurs (contact agriculteurs...)
- ☐ Je n'ai participé à aucune de ces actions

3. La participation à cette action a t'elle-eu l'influence sur votre activité professionnelle?

---

## Démarche environnementale

4. Votre entreprise possède-t-elle un label d'engagement pour l'environnement, le climat ou la biodiversité ? (ex : une certification ECOCERT)

*Une seule réponse possible.*

- ☐ Oui, grâce à la participation à un des projets avec la ville
- ☐ Oui, mais sans lien avec la ville
- ☐ Non

5. Si oui, pouvez vous préciser la/les certification(s) en question:

---

6. Avez-vous mis en place un programme dédié à l'optimisation énergétique ou à la diminution des émissions des gaz à effet de serre ?

*Une seule réponse possible.*

- ☐ Oui
- ☐ Non

7. Avez vous réussi à diminuer vos consommations d'énergie depuis ces dernières années ?

*Une seule réponse possible.*

☐ Oui

☐ Non

8. Pouvez-vous indiquer vos consommations énergétiques annuelles (ou estimations) en MWh/ an ou en euro pour la consommation d'électricité et le chauffage ainsi que le fournisseur ou la source d'énergie associée?

---

9. Pouvez-vous préciser s'il existe d'autres actions en faveur de l'environnement menées par votre établissement

---

10. Approvisionnez-vous par des produits bio et locaux? Si oui, pouvez-vous développer (fournisseurs, distances...)

---

Influence de la ville

11. Diriez-vous que la politique alimentaire de la ville a-t-elle eu l'influence sur un de ces composants:

*Plusieurs réponses possibles.*

- ☐ Oui, sur mon installation sur le territoire
- ☐ Oui, sur le changement en faveur de la durabilité (consommations énergétiques, labels...)
- ☐ Oui, sur le choix de produits (produits biologiques ou locaux)
- ☐ Oui, sur ma résilience face à différents chocs et menaces
- ☐ Peut-être
- ☐ Non, du tout

---

Ce contenu n'est ni rédigé, ni cautionné par Google.

Google Forms

# Manger à Mouans-Sartoux

1. Quel âge avez-vous ?

*Une seule réponse possible.*

- ☐ Moins de 15 ans
- ☐ Entre 15 à 24 ans
- ☐ Entre 25 à 34 ans
- ☐ Entre 35 à 49 ans
- ☐ Entre 50 et 64 ans
- ☐ Plus de 65 ans

2. Vous êtes :

*Une seule réponse possible.*

- ☐ un homme
- ☐ une femme
- ☐ Autre : \_\_\_\_\_

3. Vous êtes :

*Une seule réponse possible.*

- ☐ Agriculteur exploitant
- ☐ Artisan, commerçant, chef d'entreprise
- ☐ Cadre ou profession intellectuelle supérieure
- ☐ Profession intermédiaire
- ☐ Employé
- ☐ Ouvrier
- ☐ Retraité
- ☐ Etudiant
- ☐ Sans activité professionnelle

Déplacements pour faire les courses alimentaires

4. Où avez-vous l'habitude de faire vos courses alimentaire ?

*Plusieurs réponses possibles.*

|                       | Supermarché<br>ou<br>hypermarché | Epicerie, alimentation<br>générale, magasin spécialisé<br>(poissonnerie, boucherie, etc) | Magasins<br>alimentaires<br>bio | AMAP et<br>autres<br>systèmes de<br>paniers | Marchés                  | A la<br>ferme            | Autre                    |
|-----------------------|----------------------------------|------------------------------------------------------------------------------------------|---------------------------------|---------------------------------------------|--------------------------|--------------------------|--------------------------|
| <b>Principalement</b> | <input type="checkbox"/>         | <input type="checkbox"/>                                                                 | <input type="checkbox"/>        | <input type="checkbox"/>                    | <input type="checkbox"/> | <input type="checkbox"/> | <input type="checkbox"/> |
| <b>Régulièrement</b>  | <input type="checkbox"/>         | <input type="checkbox"/>                                                                 | <input type="checkbox"/>        | <input type="checkbox"/>                    | <input type="checkbox"/> | <input type="checkbox"/> | <input type="checkbox"/> |
| <b>ça m'arrive</b>    | <input type="checkbox"/>         | <input type="checkbox"/>                                                                 | <input type="checkbox"/>        | <input type="checkbox"/>                    | <input type="checkbox"/> | <input type="checkbox"/> | <input type="checkbox"/> |

5. Comment allez-vous principalement faire vos courses alimentaires?

*Une seule réponse possible par ligne.*

|                     | En voiture/ moto      | En transport en commun | A vélo / pied         |
|---------------------|-----------------------|------------------------|-----------------------|
| <b>Il y a 5 ans</b> | <input type="radio"/> | <input type="radio"/>  | <input type="radio"/> |
| <b>Aujourd'hui</b>  | <input type="radio"/> | <input type="radio"/>  | <input type="radio"/> |

6. A quelle fréquence utilisez-vous ce mode de transport pour aller faire vos courses alimentaires?

*Une seule réponse possible par ligne.*

|                     | Moins d'1 fois toutes les 2 semaines | 1 fois toutes les 2 semaines | 1 fois par semaine    | 2 fois par semaine    | Plus de 2 fois par semaine |
|---------------------|--------------------------------------|------------------------------|-----------------------|-----------------------|----------------------------|
| <b>Il y a 5 ans</b> | <input type="radio"/>                | <input type="radio"/>        | <input type="radio"/> | <input type="radio"/> | <input type="radio"/>      |
| <b>Aujourd'hui</b>  | <input type="radio"/>                | <input type="radio"/>        | <input type="radio"/> | <input type="radio"/> | <input type="radio"/>      |

7. Quelle distance (approximative)\* parcourez-vous pour aller faire vos courses alimentaires (aller-retour)?

\*si vous effectuez vos courses alimentaires sur votre chemin au travail/école etc. veuillez indiquer la distance EN PLUS que vous parcourez pour aller au magasin

*Une seule réponse possible par ligne.*

|                     | < 3 km                | 3-6 km                | 6-10 km               | 10-15 km              | > 15 km               |
|---------------------|-----------------------|-----------------------|-----------------------|-----------------------|-----------------------|
| <b>Il y a 5 ans</b> | <input type="radio"/> |
| <b>Aujourd'hui</b>  | <input type="radio"/> |

Régimes alimentaires

8. Comment définissez-vous l'évolution de votre régime au cours des 5 dernières années ?

*Une seule réponse possible par ligne.*

|                                                                                                                                          | Il y a 5 ans          | APRES le changement   |
|------------------------------------------------------------------------------------------------------------------------------------------|-----------------------|-----------------------|
| <b>Omnivore, et grand consommateur de viande (l'équivalent de + d'1 steak haché par jour)</b>                                            | <input type="radio"/> | <input type="radio"/> |
| <b>Omnivore et consommateur modéré de viande (l'équivalent d'un demi à 1 steak haché par jour)</b>                                       | <input type="radio"/> | <input type="radio"/> |
| <b>Omnivore, et mangeur de viande occasionnel (moins d'un demi steak haché par jour)</b>                                                 | <input type="radio"/> | <input type="radio"/> |
| <b>Je suis pescétarien :<br/>Je ne consomme pas de viande mais du poisson et des produits animaux :<br/>lait, crème, beurre, oeuf...</b> | <input type="radio"/> | <input type="radio"/> |
| <b>Je suis végétarien :<br/>Je ne consomme pas</b>                                                                                       | <input type="radio"/> | <input type="radio"/> |

**de viande ni de  
poisson, mais des  
produits animaux :  
lait, crème, beurre,  
oeuf...**

---

**Je suis végétalien : Je  
ne consomme pas de  
viande, ni poisson, ni  
produits animaux**

---

☐☐

Plus précisément, depuis votre changement comment ont évolué vos habitudes alimentaires concernant ... ?

NB: si vous ne consommez pas certains produits (par exemple la viande) alors que c'était déjà le cas avant votre changement choisissez l'option "PAS DE CHANGEMENT"

Une seule réponse possible par ligne.

[illegible]

U U U U U U U

○ ○ ○ ○ ○ ○ ○

○ ○ ○ ○ ○ ○ ○

○ ○ ○ ○ ○ ○ ○

○ ○ ○ ○ ○ ○ ○

10. Mangez vous des produits bio ? Si oui, pour quelle catégorie d'aliments ?

*Une seule réponse possible par ligne.*

|                                                      | Oui, parfois bio mais cela reste minoritaire | Oui, majoritairement bio | Très peu ou pas du tout |
|------------------------------------------------------|----------------------------------------------|--------------------------|-------------------------|
| <b>Viande</b>                                        | <input type="radio"/>                        | <input type="radio"/>    | <input type="radio"/>   |
| <b>Produits laitiers &amp; oeufs</b>                 | <input type="radio"/>                        | <input type="radio"/>    | <input type="radio"/>   |
| <b>Légumes &amp; fruits</b>                          | <input type="radio"/>                        | <input type="radio"/>    | <input type="radio"/>   |
| <b>Céréales (pâtes, riz..) &amp; pommes de terre</b> | <input type="radio"/>                        | <input type="radio"/>    | <input type="radio"/>   |

11. Votre consommation de ces produits bio a-t-elle évolué au cours des 5 dernières années?

*Une seule réponse possible.*

- ☐ J'en consomme au moins deux fois moins
- ☐ J'en consomme un peu moins
- ☐ Non elle n'a pas changé
- ☐ J'en consomme un peu plus qu'avant
- ☐ J'en consomme au moins deux fois plus qu'avant

12. Y-a-t-il des produits que vous achetez en VRAC ? (sans emballage)

*Plusieurs réponses possibles.*

- ☐ Fruits & Légumes
- ☐ Céréales (pâtes, riz..)
- ☐ Fromages (à la coupe plutôt que déjà emballé)
- ☐ Viandes (à la boucherie plutôt que déjà emballé)
- ☐ Je bois l'eau du robinet au lieu d'acheter les bouteilles d'eau
- ☐ D'autres boissons/liquide (vin, huile...)
- ☐ Je n'achète pas des produits en vrac

13. Quelle est la proportion de ces produits achetés en vrac il y a 5 ans et aujourd'hui?

*Plusieurs réponses possibles.*

|                     | Très<br>minime           | Petite (environ 1/4 des produits<br>achetés) | Environ la MOITIE des<br>produits achetés | Importante (plus de 3/4 des<br>produits achetés) |
|---------------------|--------------------------|----------------------------------------------|-------------------------------------------|--------------------------------------------------|
| <b>Il y a 5 ans</b> | <input type="checkbox"/> | <input type="checkbox"/>                     | <input type="checkbox"/>                  | <input type="checkbox"/>                         |
| <b>Aujourd'hui</b>  | <input type="checkbox"/> | <input type="checkbox"/>                     | <input type="checkbox"/>                  | <input type="checkbox"/>                         |

14. Quelle est la proportion des produits de saison dans votre panier alimentaire il y a 5 ans et aujourd'hui? (légumes d'été, d'hiver..)

*Plusieurs réponses possibles.*

|                     | Très<br>minime           | Petite (environ 1/4 des produits<br>achetés) | Environ la MOITIE des<br>produits achetés | Importante (plus de 3/4 des<br>produits achetés) |
|---------------------|--------------------------|----------------------------------------------|-------------------------------------------|--------------------------------------------------|
| <b>Il y a 5 ans</b> | <input type="checkbox"/> | <input type="checkbox"/>                     | <input type="checkbox"/>                  | <input type="checkbox"/>                         |
| <b>Aujourd'hui</b>  | <input type="checkbox"/> | <input type="checkbox"/>                     | <input type="checkbox"/>                  | <input type="checkbox"/>                         |

### Gaspillage alimentaire

15. Comment gérez-vous vos déchets alimentaires (le reste de repas, les épluchures, les produits périmés, ...) ?

*Une seule réponse possible.*

- ☐ Compost individuel
- ☐ Compost collectif
- ☐ Poubelle ordinaire
- ☐ Collecte de biodéchets par la collectivité

16. Le gaspillage alimentaire moyen par français représente environ 30% de la nourriture achetée ! Concernant votre ménage, vous diriez qu'entre les produits périmés, les fruits oubliés et les restes des repas non consommés, la part d'aliments jetée à la poubelle s'élève à (approximativement) à quelle proportion avant et après votre changement (lors ces 5 dernières années) ?

*Une seule réponse possible par ligne.*

|              | >10 %                 | 10 - 30%              | environ 30%           | 30 - 50%              | Plus de la moitié de la nourriture achetée (ou reçue) est jeté |
|--------------|-----------------------|-----------------------|-----------------------|-----------------------|----------------------------------------------------------------|
| <b>Avant</b> | <input type="radio"/>                                          |
| <b>Après</b> | <input type="radio"/>                                          |

17. Quels sont les produits qu'aujourd'hui vous gaspillez moins qu'il y a 5 ans?

*Plusieurs réponses possibles.*

- ☐ Fruits & légumes
- ☐ Produits laitiers /poisson / viande
- ☐ Produits transformés (pain, chocolat, plats préparés...)

Influence de la politique alimentaire de la ville

18. Pensez-vous que les actions de la ville et sa politique alimentaire ont eu une influence sur l'évolution de vos habitudes alimentaires (courses, menus, gaspillage, etc) ?

*Plusieurs réponses possibles.*

- ☐ Oui, sur le lieu d'achat (grande surface, marché...)
- ☐ Oui, sur le transport (mode/distance de déplacement)
- ☐ Oui, sur le changement des régimes alimentaires (plus ou moins de viande, de légumes..)
- ☐ Oui, sur la consommation des produits bio
- ☐ Oui, sur l'achat des produits en vrac
- ☐ Oui, sur l'achat des produits de saison
- ☐ Oui, sur le compostage
- ☐ Oui, sur le gaspillage alimentaire
- ☐ Oui, sur mes connaissances sur l'alimentation durable
- ☐ Non, je ne pense pas être influencé par les actions de la ville

19. Avez-vous participé aux actions listées ci-dessous ? (cochez toutes celles qui vous concernent de près ou de loin)

*Plusieurs réponses possibles.*

- ☐ Votre ou vos enfant(s) fréquente(nt) ou ont fréquenté la cantine scolaire d'une école de la ville
- ☐ Vous ou un membre de votre famille fréquente l'épicerie sociale
- ☐ Vous ou un membre de votre famille a participé au défi Foyer à Alimentation Positive
- ☐ Vous fréquentez le marché des producteurs de la ville du mercredi soir
- ☐ Vous participez au projet "Le citoyen nourrit la ville"
- ☐ Vous avez participé à un évènement du projet "Alimentation durable en entreprise"
- ☐ Vous avez participé à un évènement organisé par la Maison de l'Education à l'Alimentation Durable (MEAD) : Printemps des possibles, Festival Alimenterre...

---

Ce contenu n'est ni rédigé, ni cautionné par Google.

**Google Forms**
